# Supplementary material for: The Molecular Switch of Telomere Phages: High Binding Specificity of the PY54 Cro Lytic Repressor to a Single Operator Site
Source: MDPI journal article supplement (doi:10.3390/v7062746), 2015-06-02
Supplement: s1 [file s1]

# Supplemental Information

**Table S1.** Bacterial strains, phages and plasmids.

| Strains                          | Description                                                                                                                                                   | Reference or origin |
|----------------------------------|---------------------------------------------------------------------------------------------------------------------------------------------------------------|---------------------|
| <i>E. coli</i> SCS1              | <i>recA1 endA1 gyrA96 thi-1 hsdR17(rK-mK+) supE44 relA1</i>                                                                                                   | Stratagene          |
| <i>E. coli</i> UT5600            | F- <i>ara-14 leuB6 secA6 lacY1 proC14 tsx-67 Δ(ompT-fepC)266 entA403 trpE38 rfbD1 rpsL109 xyl-5 mtl-1 thi-1</i>                                               | NEB                 |
| <i>E. coli</i> Genehogs          | F- <i>mcrA Δ(mrr-hsdRMS-mcrBC) φ80 lacZ ΔM15 ΔlacX74 recA1 araD139 Δ(ara-leu)7697 galU galK rpsL (Smr) endA1 nupG fhuA::IS2</i> (confers phage T1 resistance) | Invitrogen          |
| <i>E. coli</i> C-1a              | derived from C-1; fertility type F-, prototrophic                                                                                                             | [1]                 |
| <i>E. coli</i> C-1a (N15)        | derived from C-1; fertility type F-, prototrophic; contains the N15 prophage                                                                                  | G. Deho             |
| <i>Y. enterocolitica</i> 83/88/2 | serogroup O:5,27; biogroup 2 strain; isolated from man; cured from <i>Yersinia</i> virulence plasmid (pYV)                                                    | [2–4]               |
| <i>Y. enterocolitica</i> 29854   | serogroup O:5; biogroup 1A strain; isolated from food; contains the PY54 prophage                                                                             | [2–4]               |
| <i>K. oxytoca</i> CCUG 15788     | wild type strain, isolated from a mineral oil emulsion tank in Göteborg, Sweden; contains the φKO2 prophage                                                   | [5]                 |
| Phages                           | Description                                                                                                                                                   | Reference or Origin |
| PY54                             | 46.3 kb; isolated from <i>Y. enterocolitica</i> strain 29854                                                                                                  | [2–4]               |
| PY54-35Tc                        | PY54 mutant; Tcr inserted into ORF35                                                                                                                          | This work           |
| N15                              | 46.3 kb; isolated from sewage                                                                                                                                 | [6–8]               |
| N15-D04                          | N15 mutant; Cmr inserted into ORF36                                                                                                                           | [9]                 |
| φKO2                             | 51.6 kb, isolated from <i>K. oxytoca</i> strain CCUG 15788                                                                                                    | [5]                 |
| Plasmids                         | Description                                                                                                                                                   | Reference or Origin |
| pBR329                           | 4.2 kb cloning vector, pMB1 replicon; Apr, Cmr, Tcr                                                                                                           | [10]                |
| pMS470Δ8cat                      | 6.9 kb cloning vector, pMB1 replicon, <i>Ptac/ lacI</i> ; T7 gene Shine-Dalgarno sequence; Apr, Cmr                                                           | [11]                |
| pIV2                             | 3.6 kb <i>Yersinia</i> cloning vector; Kmr                                                                                                                    | [12]                |
| pLitmus38                        | 2.8 kb cloning vector; Apr                                                                                                                                    | NEB                 |
| pKKlux                           | 7.7 kb promoter probe vector; pMB1 replicon; promoterless <i>luxAB</i> genes from <i>Vibrio harveyi</i> ; T1T2 of <i>rrnB</i> ; Apr                           | [13]                |
| pKKL700lux                       | 9.3 kb; derived from pKKlux, contains the <i>Solanum tuberosum</i> ST-LS promoter; Apr                                                                        | [13]                |

Table S1. *Cont.*

| Plasmids  | Description                                                                                                                                                             | Reference or Origin |
|-----------|-------------------------------------------------------------------------------------------------------------------------------------------------------------------------|---------------------|
| pJH136-1  | contains the 18 bp palindromic OR3 operator sequence<br>pBR329 Δ[BamHI-HindIII] Ω[PCR, 18 bp, BamHI-HindIII], PY54 32,535–32,552                                        | Figure 5, this work |
| pJH136-2  | contains the 16 bp OR3 operator sequence<br>pBR329 Δ[BamHI-HindIII] Ω[PCR, 16 bp, BamHI-HindIII], PY54 32,536–32,551                                                    | Figure 5, this work |
| pJH136-3  | contains 14 bp of the central OR3 operator<br>pBR329 Δ[BamHI-HindIII] Ω[PCR, 14 bp, BamHI-HindIII], PY54 32,537–32,550                                                  | Figure 5, this work |
| pJH136-4  | contains the right-arm of the OR3 palindrome<br>pBR329 Δ[BamHI-HindIII] Ω[PCR, 10 bp, BamHI-HindIII], PY54 32,543–32,552                                                | Figure 5, this work |
| pJH136-5  | contains the left-arm of the OR3 palindrome<br>pBR329 Δ[BamHI-HindIII] Ω[PCR, 10 bp, BamHI-HindIII], PY54 32,535–32,544                                                 | Figure 5, this work |
| pJH136-6  | contains the 18 bp palindromic OR3 operator with a central A/T nucleotide change<br>pBR329 D[BamHI-HindIII] W[PCR, 18 bp, BamHI-HindIII], PY54 32,535–32,552            | Figure 5, this work |
| pJH136-7  | contains the 18 bp palindromic OR3 operator with a central G/C nucleotide change<br>pBR329 D[BamHI-HindIII] W[PCR, 18 bp, BamHI-HindIII], PY54 32,535–32,552            | Figure 5, this work |
| pJH136-8  | contains the 18 bp palindromic OR3 operator with a partial adaption to the N15 OR3 operator<br>pBR329 D[BamHI-HindIII] W[PCR, 18 bp, BamHI-HindIII], PY54 32,535–32,552 | Figure 5, this work |
| pJH136-9  | contains the 18 bp palindromic OR3 operator with a partial adaption to the N15 OR3 operator<br>pBR329 D[BamHI-HindIII] W[PCR, 18 bp, BamHI-HindIII], PY54 32,535–32,552 | Figure 5, this work |
| pJH136-10 | contains the 18 bp palindromic OR3 operator of N15<br>pBR329 D[BamHI-HindIII] W[PCR, 18 bp, BamHI-HindIII], PY54 32,535–32,552                                          | Figure 5, this work |
| pJH142-2  | PY54 <i>cro</i> gene expression plasmid                                                                                                                                 | This work           |
| pJH192    | pMS470D8 <i>cat</i> D[NdeI-HindIII] W[PCR, <i>cro</i> gene, NdeI-HindIII], PY54 32,629–32,831                                                                           | This work           |
| pJH281    | contains the <i>cro</i> gene and the intergenic repressor region<br>pIV2 D[HindIII-XbaI] W[PCR, 308 bp, HindIII-XbaI], PY54 32,525–32,832                               | Figure 6, this work |
| pJH282    | contains 138 bp of the upstream region of the <i>cI</i> gene<br>pKKluxBamHI D[SmaI-XbaI] W[PCR, 138 bp, SmaI-XbaI], PY54 32,525–32,662                                  | Figure 6, this work |
|           | contains 104 bp of the upstream region of the <i>cI</i> gene<br>pKKluxBamHI D[SmaI-XbaI] W[PCR, 104 bp, SmaI-XbaI], PY54 32,525–32,628                                  | Figure 6, this work |

Table S1. *Cont.*

| Plasmids | Description                                                                                                                                                                                                               | Reference or Origin |
|----------|---------------------------------------------------------------------------------------------------------------------------------------------------------------------------------------------------------------------------|---------------------|
| pJH283   | contains 80 bp of the upstream region of the <i>cI</i> gene<br>pKKluxBamHI D[SmaI-XbaI] W[PCR, 80 bp, SmaI-XbaI], PY54 32,525–32,604                                                                                      | Figure 6, this work |
| pJH284   | contains 59 bp of the upstream region of the <i>cI</i> gene<br>pKKluxBamHI D[SmaI-XbaI] W[PCR, 59 bp, SmaI-XbaI], PY54 32,525–32,583                                                                                      | Figure 6, this work |
| pJH287   | contains 64 bp of the upstream region of the <i>cro</i> gene including a single nucleotide polymorphism at 1st position of the P1 TATA (-10) box<br>pKKluxBamHI D[SmaI-XbaI] W[PCR, 64 bp, SmaI-XbaI], PY54 32,565–32,628 | Figure 6, this work |
| pJH288   | contains 64 bp of the upstream region of the <i>cro</i> gene including a single nucleotide polymorphism at 3rd position of the P1 TATA (-10) box<br>pKKluxBamHI D[SmaI-XbaI] W[PCR, 45 bp, SmaI-XbaI], PY54 32,584–32,628 | Figure 6, this wor  |
| pJH289   | contains 36 bp of the upstream region of the <i>cro</i> gene<br>pKKluxBamHI D[SmaI-XbaI] W[PCR, 36 bp, SmaI-XbaI], PY54 32,593–32,628                                                                                     | Figure 6, this work |
| pJH290   | contains 21 bp of the upstream region of the <i>cro</i> gene<br>pKKluxBamHI D[SmaI-XbaI] W[PCR, 21 bp, SmaI-XbaI], PY54 32,608–32,628                                                                                     | Figure 6, this work |
| pJH291   | pKKluxBamHI D[SmaI-XbaI] W[PCR, 60 bp, SmaI-XbaI], PY54 32,525–32,584                                                                                                                                                     | Figure 6, this work |
| pJH292   | pKKluxBamHI D[SmaI-XbaI] W[PCR, 75 bp, SmaI-XbaI], PY54 32,525–32,599                                                                                                                                                     | Figure 6, this work |
| pJH293   | pKKluxBamHI D[SmaI-XbaI] W[SmaI-XbaI, PY54 32,524–32,778]                                                                                                                                                                 | Figure 7, this work |
| pJH294   | pKKluxBamHI D[SmaI-XbaI] W[SmaI-XbaI, PY54 32,524–32,803]                                                                                                                                                                 | Figure 7, this work |
| pJH295   | pKKluxBamHI D[SmaI-XbaI] W[SmaI-XbaI, PY54 32,524–32,828]                                                                                                                                                                 | Figure 7, this work |
| pJH296   | pKKluxBamHI D[SmaI-XbaI] W[SmaI-XbaI, PY54 32,524–32,831]                                                                                                                                                                 | Figure 7, this work |
| pJH297   | contains an OR3 mutation<br>pKKluxBamHI D[SmaI-XbaI] W[SmaI-XbaI, PY54 32,524–32,831]                                                                                                                                     | Figure 7, this work |

**Table S2.** Purification of the PY54 Cro repressor.

| Fraction | Purification Step                    | Protein [mg] <sup>a</sup> | Recovery [%] | Purity [%] |
|----------|--------------------------------------|---------------------------|--------------|------------|
| I        | Crude extract <sup>b</sup>           | 229.2                     | 100          | 9          |
| II       | Heparin-Sepharose <sup>TM</sup>      | 55.5                      | 24.2         | 55         |
| III      | DEAE-Sepharce <sup>TM</sup>          | 50.5                      | 22.0         | 73         |
| IV       | CM-Sepharose <sup>TM</sup> fast flow | 34.6                      | 15.1         | 94         |

<sup>a</sup> From laser densitometrical measurement on gels; <sup>b</sup> From 29.55 g of cell paste.

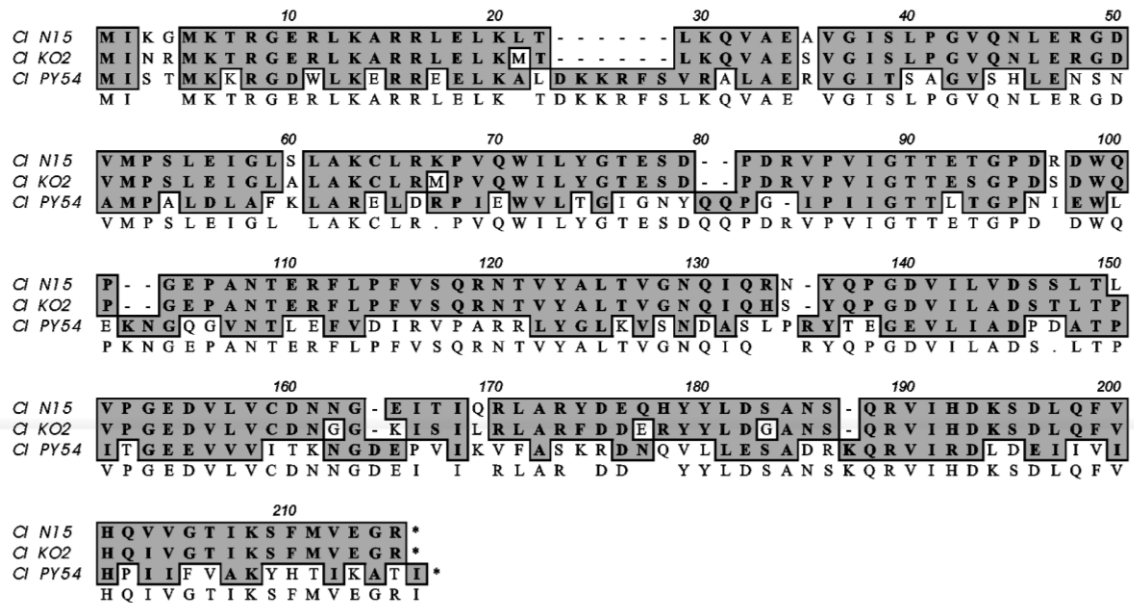

**Figure S1.** Sequence analysis of PY54 CI. Alignment of the amino acid sequences of the CI/CB prophage repressors of PY54, φKO2 and N15. Similar and identical residues at corresponding positions are shown in light grey and dark grey, respectively.

## References

1. Sasaki, I.; Bertani, G. Growth abnormalities in Hfr derivatives of *Escherichia coli* strain C. *J. Gen. Microbiol.* **1965**, *40*, 365–376.
2. Hertwig, S.; Klein, I.; Schmidt, V.; Beck, S.; Hammerl, J.A.; Appel, B. Sequence analysis of the genome of the temperate *Yersinia enterocolitica* phage PY54. *J. Mol. Biol.* **2003**, *331*, 605–622.
3. Hertwig, S.; Klein, I.; Appel, B. Properties of the temperate *Yersinia enterocolitica* bacteriophage PY54. *Adv. Exp. Med. Biol.* **2003**, *529*, 241–243.
4. Hertwig, S.; Klein, I.; Lurz, R.; Lanka, E.; Appel, B. PY54, a linear plasmid prophage of *Yersinia enterocolitica* with covalently closed ends. *Mol. Microbiol.* **2003**, *48*, 989–1003.
5. Casjens, S.R.; Gilcrease, E.B.; Huang, W.M.; Bunny, K.L.; Pedulla, M.L.; Ford, M.E.; Houtz, J.M.; Hatfull, G.F. Hendrix, R.W. The pKO2 linear plasmid prophage of *Klebsiella oxytoca*. *J. Bacteriol.* **2004**, *186*, 1818–1832.
6. Ravin, N.V. N15: the linear phage-plasmid. *Plasmid* **2011**, *65*, 102–109.

7. Ravin, V., Ravin, N., Casjens, S., Ford, M.E., Hatfull, G.F., Hendrix, R.W. Genomic sequence and analysis of the atypical temperate bacteriophage N15. *J. Mol. Biol.* **2000**, 299, 53–73.
8. Rybchin, V.N.; Svarchevsky, A.N. The plasmid prophage N15: A linear DNA with covalently closed ends. *Mol. Microbiol.* **1999**, 33, 895–903.
9. Hammerl, J.A.; Klein, I.; Appel, B.; Hertwig, S. Interplay between the temperate phages PY54 and N15, linear plasmid prophages with covalently closed ends. *J. Bacteriol.* **2007**, 189, 8366–8370.
10. Covarrubias, L.; Bolivar, F. Construction and characterization of new cloning vehicles. VI. Plasmid pBR329, a new derivative of pBR328 lacking the 482-base- pair inverted duplication. *Gene* **1982**, 17, 79–89.
11. Balzer, D.; Ziegelin, G.; Pansegrau, W.; Kruft, V.; Lanka, E. KorB protein of promiscuous plasmid RP4 recognizes inverted sequence repetitions in regions essential for conjugative plasmid transfer. *Nucl. Acids Res.* **1992**, 20, 1851–1858.
12. Strauch, E.; Voigt, I.; Broll, H. Appel, B. Use of a plasmid of a *Yersinia enterocolitica* biogroup 1A strain for the construction of cloning vectors. *J. Biotechnol.* **2000**, 79, 63–72.
13. Jacob, D.; Lewin, A.; Meister, B.; Appel, B. Plant-specific promoter sequences carry elements that are recognised by the eubacterial transcription machinery. *Transgenic Res.* **2002**, 11, 291–303.
